# Supplementary material for: Long non-coding RNAs: novel prognostic biomarkers for liver metastases in patients with early stage colorectal cancer
Source: PubMed Central journal article supplement (PMC5226593; doi:10.18632/oncotarget.10416), 2016-07-06
Supplement: oncotarget-07-50428-s001.pdf [file oncotarget-07-50428-s001.pdf]

## Long non-coding RNAs: novel prognostic biomarkers for liver metastases in patients with early stage colorectal cancer

### SUPPLEMENTARY FIGURES AND TABLES

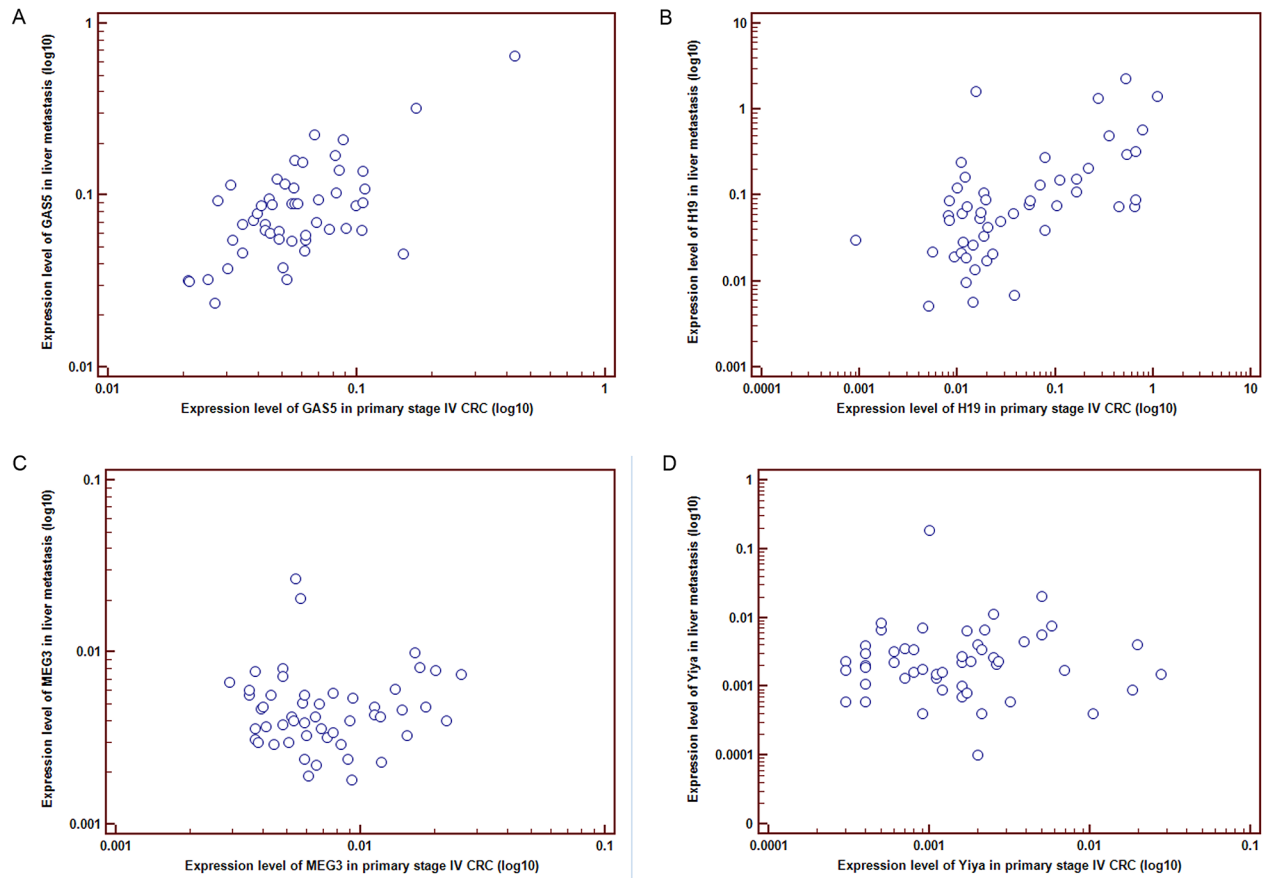

**Supplementary Figure S1: Scatter-plots indicating the differential expressions of four candidate lncRNAs between primary CRC and liver metastases. A-D. Scatter-plots of GAS5, H19, MEG3 and Yiya, respectively.**

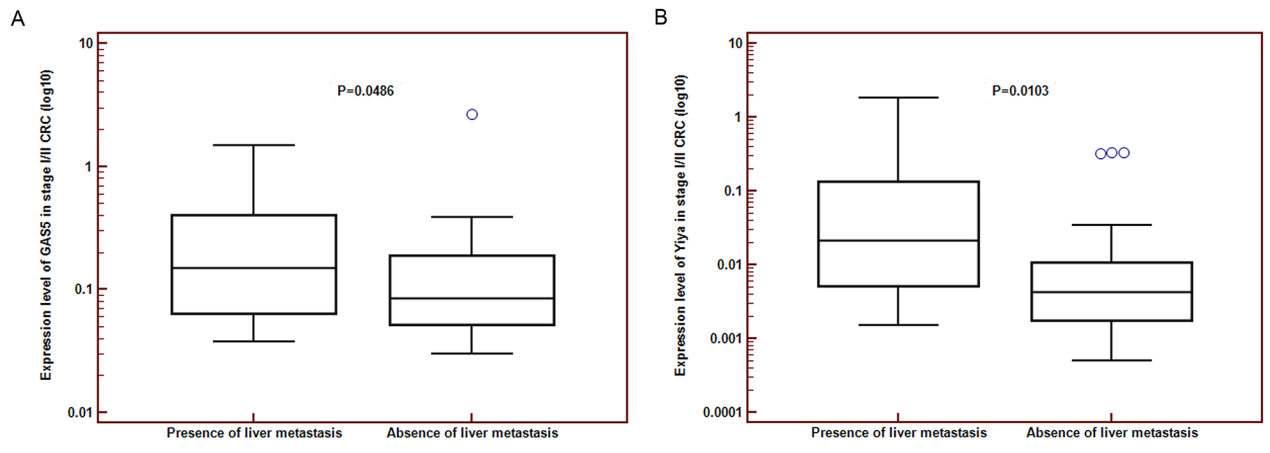

**Supplementary Figure S2: Box-plots indicating the differential expressions of GAS5 and Yiya in stage I/II CRC with and without liver metastases. A-B. Box-plots of GAS5 and Yiya, respectively.**

**Supplementary Table S1: Quality assessment of short amplicons in stage IV colorectal carcinoma with liver metastases.**

See Supplementary File 1

**Supplementary Table S2: The expression levels of collected lncRNAs in different tumor types.**

See Supplementary File 2

**Supplementary Table S3: Primer sequence and amplification efficiency of short amplicons.**

See Supplementary File 3
